# Supplementary material
Source: PubMed Central journal article supplement (PMC4556016)
Supplement: EXCLI-12-215-s-001.pdf [file EXCLI-12-215-s-001.pdf]

**Supplementary material to:**

**COMPUTATIONAL MODELING AND VALIDATION STUDIES OF  
3-D STRUCTURE OF NEURAMINIDASE PROTEIN OF  
H1N1 INFLUENZA A VIRUS AND SUBSEQUENT IN SILICO ELUCIDATION  
OF PICEID ANALOGUES AS ITS POTENT INHIBITORS**

Chhedi Lal Gupta<sup>a</sup>, Salman Akhtar<sup>b</sup>, Preeti Bajpai<sup>b</sup>, K. N. Kandpal<sup>a</sup>, G. S. Desai<sup>c</sup>,  
Ashok K. Tiwari<sup>a\*</sup>

“Drug like” properties according to Lipinski’s Rule of the two novel compounds screened from docking experiments

| Compound<br>(ChemBank<br>ID) | nViol    | LogP*        | MW             | nHbA     | nHbD     | nRb      |
|------------------------------|----------|--------------|----------------|----------|----------|----------|
| <b>2110359</b>               | 1        | 1.109        | 390.384        | 8        | 6        | <b>5</b> |
| <b>3075417</b>               | <b>1</b> | <b>1.093</b> | <b>420.409</b> | <b>9</b> | <b>6</b> | <b>6</b> |

The molecular properties of novel compounds were calculated from ChemBank database.

- nViol – Number of Violations
- LogP\* – LogP by Ghose Crippen
- MW – Molecular weight
- nHbA – Number of Hydrogen bond Acceptors
- nHbD – Number of Hydrogen bond Donors
- nRb – Number of Rotatable bonds
